# Supplementary material
Source: Springer Nature journal article supplement (https://www.springermedizin.de/resource/supplementary/12967_2011_947_MOESM1_ESM.pdf/9577202)

mock 3 6 9 12 15 18 21 days p.i.

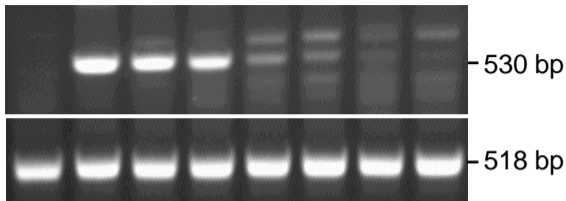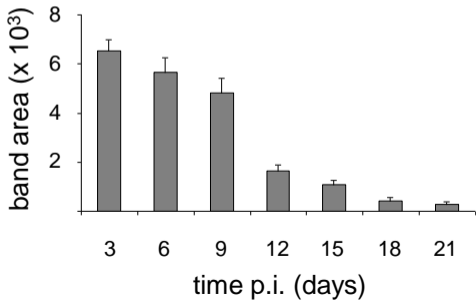

Supplement: MOESM1 [file 9577202]
